# Supplementary material for: Sequential production of gametes during meiosis in trypanosomes
Source: PubMed Central journal article supplement (PMC8113336; doi:10.1038/s42003-021-02058-5), 2021-05-11
Supplement: 42003_2021_2058_MOESM3_ESM.pdf [file 42003_2021_2058_MOESM3_ESM.pdf]

## Description of Additional Supplementary Files

**File name:** Supplementary Data 1

**Description:** Excel file containing mensural data for individual cells.
